# Supplementary material for: Magnesium implantation or supplementation ameliorates bone disorder in CFTR-mutant mice through an ATF4-dependent Wnt/β-catenin signaling
Source: PubMed Central journal article supplement — Bioact Mater. 2021 Jul 3;8:95–108. doi: 10.1016/j.bioactmat.2021.06.034 (PMC8424424; doi:10.1016/j.bioactmat.2021.06.034), 2021-07-03
Supplement: mmc1.pdf [file mmc1.pdf]

**Magnesium implantation or supplementation ameliorates bone disorder in CFTR-mutant mice through an ATF4-dependent Wnt/ $\beta$ -catenin signaling**

Jiankun XU<sup>1,6</sup>, Peijie HU<sup>2,6</sup>, Xiaotian ZHANG<sup>2</sup>, Junjiang CHEN<sup>2,3</sup>, Jiali WANG<sup>1,4</sup>, Jieting ZHANG<sup>3</sup>, Ziyi CHEN<sup>1,3</sup>, Mei Kuen YU<sup>2,3</sup>, Yiu Wa CHUNG<sup>3</sup>, Yan WANG<sup>3</sup>, Xiaohu ZHANG<sup>3</sup>, Yifeng ZHANG<sup>1,5</sup>, Nianye ZHENG<sup>1</sup>, Hao YAO<sup>1</sup>, Jiang YUE<sup>1</sup>, Hsiao Chang CHAN<sup>3</sup>, Ling QIN<sup>1,\*</sup>, Ye Chun RUAN<sup>2,\*</sup>

<sup>1</sup>*Musculoskeletal Research Laboratory, Department of Orthopedics & Traumatology, The Chinese University of Hong Kong, Hong Kong, China.*

<sup>2</sup>*Department of Biomedical Engineering, Faculty of Engineering, the Hong Kong Polytechnic University, Hong Kong, China.*

<sup>3</sup>*Epithelial Cell Biology Research Centre, School of Biomedical Sciences, Faculty of Medicine, the Chinese University of Hong Kong, Hong Kong, China.*

<sup>4</sup>*School of Biomedical Engineering, Sun Yat-sen University, Guangzhou, China*

<sup>5</sup>*School of Life Science and Technology, ShanghaiTech University, Shanghai, China.* <sup>6</sup>*These authors contributed equally.*

*\*Correspondence should be sent to: sharon.yc.ruan@polyu.edu.hk (YCR) and lingqin@cuhk.edu.hk (LQ)*

## Supplementary Information

### Supplementary Table. Primer sequences

| Gene name      | Forward (5' - 3')     | Reverse (5' - 3')     |
|----------------|-----------------------|-----------------------|
| <i>Cldn16</i>  | GAGACCAATAGCAACAGAGG  | GTGGAGAATATGGCCAAGAA  |
| <i>Cnnm1</i>   | GGCCAGTAAGTGATGATGAG  | GCAGAGGGTGGAGTTAATAC  |
| <i>Cnnm2</i>   | GGAGATAGGCACGGTCTATAA | CCGGTTATCATGAAGCAGTC  |
| <i>Cnnm3</i>   | GAGCCCTTGTACCCTTTATC  | GTCCAGCGGGTTAGTATTC   |
| <i>Cnnm4</i>   | TCGGAGATTATGGAGAGTGG  | GGTTGTAGAAGCGAGTGATG  |
| <i>Magt1</i>   | GCCTTCAGCTCACATTCAT   | GTGCCTGCTACCATTCTTT   |
| <i>Nipa2</i>   | GTGTGAAGGGTTTGGGTATC  | AGAGCCCGGTTTAGGTAAT   |
| <i>Slc1a1</i>  | CTACACTTCTGTCCTCATCCT | CGGTTACCTTCCTGCTATCT  |
| <i>Slc41a1</i> | TGCTTCAACTCCTCGTAATC  | GGGTCACTACCACTCATTTC  |
| <i>Slc41a2</i> | GGCTGTTCCCTACCCATTTAG | AGACTACAGTCAGAGAGGTG  |
| <i>Trpm6</i>   | CACCAATACCCTGGAAGAAC  | AACACCATCCCTCTTGATTG  |
| <i>Trpm7</i>   | CGGATTGGTTACGAGATAGAC | GTACAGGAACGAAGGGAATAC |
| <i>Trpv2</i>   | CTGGCTGAACCTGCTTTAT   | CTTACTAGGGCTACAGCAAAG |
| <i>Trpv4</i>   | TGAGATGCTGGCTGTAGA    | CCTCCAGTGGCTGATAGTA   |

## Supplementary Fig 1

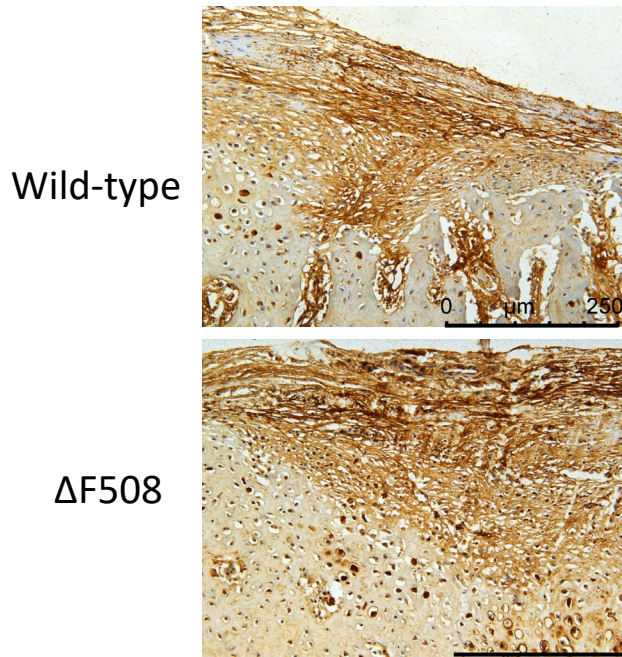

**Supplementary Figure 1. Immuno-staining for CGRP in bone tissues from wild-type and age-matched  $\Delta$ F508 mice. Scale bars, 250  $\mu$ m.**

## Supplementary Fig 2

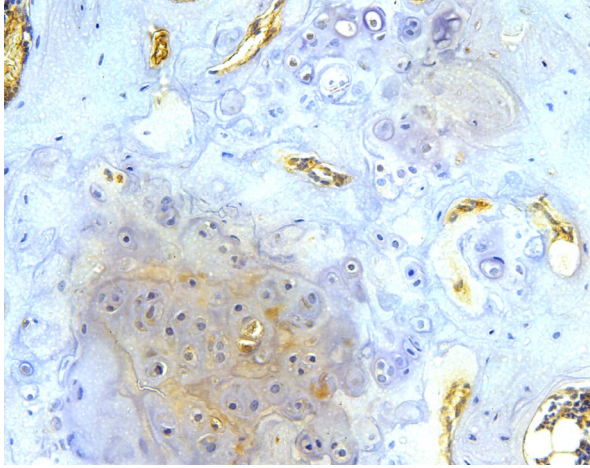

**Supplementary Figure 2. Involvement of Wnt signaling in magnesium's effect on  $\Delta F508$  mice.** Immunohistochemical staining for active  $\beta$ -catenin in trabecular bones from wild-type mice at 2 weeks post Mg implantation. Active  $\beta$ -catenin was expressed in both osteoblasts and osteocytes. Scale bar, 100  $\mu$ m.
